# Supplementary material
Source: PubMed Central journal article supplement (PMC2867702)
Supplement: 0913997107_pnas.0913997107_SI.pdf [file 0913997107_pnas.0913997107_SI.pdf]

# Supporting Information

Heinrich et al. 10.1073/pnas.0913997107

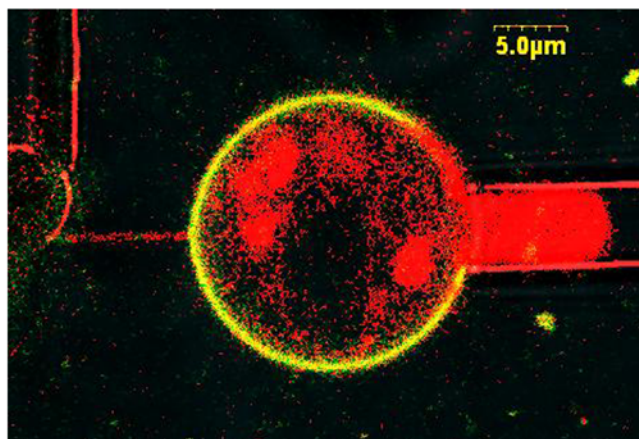

**Movie S1.** Ld phase tubes can be pulled out of Lo phase domain of a vesicle at low pulling speeds. A tube was pulled slowly from the ordered phase of the vesicle at an average pulling speed of about  $0.04 \mu\text{m/s}$ . A continuous Ld tube was generated from the Lo phase of the vesicle.

[Movie S1 \(AVI\)](#)

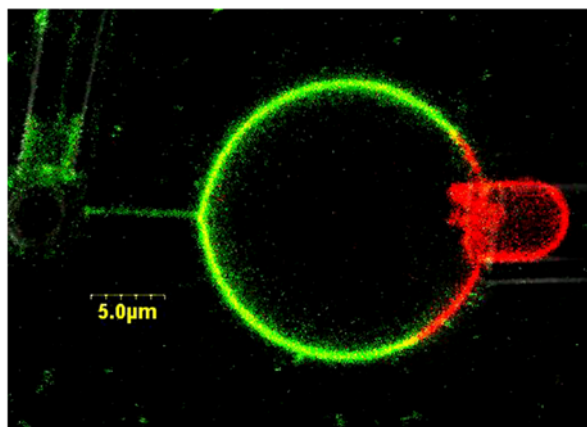

**Movie S2.** Lo phase tubes are pulled out of Lo phase domain of a vesicle at high pulling speeds. A tube was pulled at high speed of  $1.5 \mu\text{m/s}$ , resulting in an Lo tube. Reservoir membrane tension for movies 1 and 2 was  $\sigma = 3.5 \cdot 10^{-5} \text{ N/m}$ .

[Movie S2 \(AVI\)](#)
